# Supplementary material
Source: HighWire-hosted journal article supplement (https://cmaj.ca/highwire/filestream/57598/field_highwire_adjunct_files/0/chiavetta.pdf)
Supplement: chiavetta.pdf [file chiavetta.pdf]

**eTable: Incidence rates and residual risks of transfusion-transmitted infection from HIV, HCV, HBV and HTLV among repeat blood donors, by 2-year intervals from 1990 to 2000**

| Virus; interval | No. of incident cases | No. of person-years | Incidence rate per 100 000 person-years (and 95% CI) | Window period (and 95% CI) | Residual risk per million donations (and 95% CI) |
|-----------------|-----------------------|---------------------|------------------------------------------------------|----------------------------|--------------------------------------------------|
| <b>HIV*</b>     |                       |                     |                                                      |                            |                                                  |
| 1990–1992       | 10                    | 861 414             | 1.16 (0.63–2.16)                                     | 45 (34–55)                 | 1.43 (0.58–3.25)                                 |
| 1993–1994       | 2                     | 771 857             | 0.26 (0.03–0.94)                                     | 22 (6–38)                  | 0.16 (0.01–0.97)                                 |
| 1995–1996       | 3                     | 650 761             | 0.46 (0.10–1.35)                                     | 22 (6–38)                  | 0.28 (0.02–1.40)                                 |
| 1997–1998       | 4                     | 589 531             | 0.68 (0.19–1.74)                                     | 16 (8–24)                  | 0.30 (0.04–1.14)                                 |
| 1999–2000       | 1                     | 445 222             | 0.23 (0.01–1.25)                                     | 16 (8–24)                  | 0.10 (0–0.82)                                    |
| <b>HCV*</b>     |                       |                     |                                                      |                            |                                                  |
| 1992–1994       | 13                    | 825 391             | 1.58 (0.92–2.71)                                     | 82 (54–192)                | 3.54 (1.35–14.27)                                |
| 1995–1996       | 21                    | 650 622             | 3.23 (2.10–4.95)                                     | 82 (54–192)                | 7.25 (3.11–26.04)                                |
| 1997–1998       | 14                    | 589 522             | 2.38 (1.41–4.01)                                     | 66 (38–94)                 | 4.29 (1.46–10.33)                                |
| 1999–2000       | 3                     | 445 220             | 0.67 (0.14–1.97)                                     | 19 (10–29)                 | 0.35 (0.04–1.57)                                 |
| <b>HBV*†</b>    |                       |                     |                                                      |                            |                                                  |
| 1990–1992       | 27                    | 861 408             | 4.61 (3.16–6.72)                                     | 59 (37–87)                 | 7.45 (3.20–16.02)                                |
| 1993–1994       | 44                    | 771 839             | 8.61 (6.40–11.56)                                    | 59 (37–87)                 | 13.91 (6.49–27.56)                               |
| 1995–1996       | 11                    | 650 753             | 3.16 (1.75–5.71)                                     | 59 (37–87)                 | 5.11 (1.77–13.61)                                |
| 1997–1998       | 5                     | 589 527             | 1.57 (0.65–3.77)                                     | 59 (37–87)                 | 2.54 (0.66–9.00)                                 |
| 1999–2000       | 26                    | 445 215             | 8.59 (5.85–12.61)                                    | 59 (37–87)                 | 13.88 (5.93–30.06)                               |
| <b>HTLV*</b>    |                       |                     |                                                      |                            |                                                  |
| 1990–1992       | 9                     | 861 413             | 1.05 (0.54–2.01)                                     | 51 (36–72)                 | 1.46 (0.54–3.96)                                 |
| 1993–1994       | 3                     | 771 855             | 0.39 (0.08–1.14)                                     | 51 (36–72)                 | 0.54 (0.08–2.24)                                 |
| 1995–1996       | 0                     | 650 762             | 0‡ (0–0.57)                                          | 51 (36–72)                 | 0‡ (0–1.12)                                      |
| 1997–1998       | 4                     | 589 532             | 0.68 (0.19–1.74)                                     | 51 (36–72)                 | 0.95 (0.18–3.43)                                 |
| 1999–2000       | 0                     | 445 222             | 0‡ (0–0.83)                                          | 51 (36–72)                 | 0‡ (0–1.64)                                      |

Note: Abbreviations are defined in Table 1.

\*Test for linear trend in incidence rates over time: HIV,  $p = 0.19$ ; HCV,  $p = 0.026$ ; HBV,  $p = 0.92$ ; HTLV,  $p = 0.25$ .

†HBV incidence rates were adjusted for transient antigenemia according to the methods described by Schreiber and colleagues<sup>7</sup> and Korelitz and colleagues.<sup>25</sup>

‡Point estimate equals 0 because there were no incident cases in the interval. Refer to the CI for an estimate of the range of values for the rate.
